# Supplementary material for: Dietary intake, food composition and nutritional status of chronic wound patients attending a health care centre in Côte d’Ivoire
Source: Research Square preprint supplement (doi:10.21203/rs.3.rs-8786462/v1), 2026-02-20
Supplement: Supplementary file 1 [file a54d03e72048d3bb77ff90bc.docx]

**SECTION 8: 24-HOUR RECALL**

What did you eat yesterday up to now? (Between waking up yesterday morning and waking up this morning)

| **N°** | **MOMENT** | **Type of food (A)** | **Repas (B)** | | | **Portion consumed (C) (see catalogue)** | | |
| --- | --- | --- | --- | --- | --- | --- | --- | --- |
| R24 01A | **Breakfast** | A. Starchy foods (cereals, tubers, plantains, cassava, sweet potatoes) |  |  |  |  |  |  |
| R24 01B | B. Sauce (eggplant, peanut, seeds, okra, leaves, tomato) |  |  |  |  |  |  |
| R24 01C | C. Meat and offal/Fish Poultry/Eggs/Shellfish |  |  |  |  |  |  |
| R24 01D | D. Drink (Hibiscus, ginger, tamarind, passion fruit) |  |  |  |  |  |  |
| R24 01E | E. Dairy products (milk, cheese) |  |  |  |  |  |  |
| R24 01F | F. Fruit/Vegetables (Ripe mangoes, oranges, melons, ripe papayas, mandarins, grapefruit/ Dark green leafy vegetables, cassava leaves, spinach and green cabbage leaves, baobab leaves, parsley, squash, dried bay leaves, carrots, squash, red pepper, cabbage) |  |  |  |  |  |  |
| R24 01G | G. Sweets (candy, biscuits, chocolate, cocoa powder, coffee powder, etc.) |  |  |  |  |  |  |
| R24 02A | **Collation (10 h)** | A. Starchy foods (cereals, tubers, plantains, cassava, sweet potatoes) |  |  |  |  |  |  |
| R24 02B | B Sauce (eggplant, peanut, seeds, okra, leaves, tomato) |  |  |  |  |  |  |
| R24 02C | C. Meat and offal/Fish Poultry/Eggs…shellfish |  |  |  |  |  |  |
| R24 02D | D. Drink (Hibiscus, ginger, tamarind, passion fruit) |  |  |  |  |  |  |
| R24 02E | E. Dairy products (milk, cheese) |  |  |  |  |  |  |
| R24 02F | F. Fruit/Vegetables (Ripe mangoes, oranges, melons, ripe papayas, mandarins, grapefruit/ Dark green leafy vegetables, cassava leaves, spinach and green cabbage leaves, baobab leaves, parsley, squash, dried bay leaves, carrots, squash, red peppers, cabbage) |  |  |  |  |  |  |
| R24 02G | G. Sweets (candy, biscuits, chocolate, cocoa powder, coffee powder, etc.) |  |  |  |  |  |  |
| R24 03A | **Lunch** | A. Starchy foods (cereals, tubers, plantains, cassava, sweet potatoes) |  |  |  |  |  |  |
| R24 03B | B. Sauce (eggplant, peanut, seeds, okra, leaves, tomato) |  |  |  |  |  |  |
| R24 03C | C. Meat and offal/Fish Poultry/Eggs…shellfish |  |  |  |  |  |  |
| R24 03D | D. Drink (Hibiscus, ginger, tamarind, passion fruit) |  |  |  |  |  |  |
| R24 03E | E. Dairy products (milk, cheese) |  |  |  |  |  |  |
| R24 03F | F. Fruit/Vegetables (Ripe mangoes, oranges, melons, ripe papayas, mandarins, grapefruit/Dark green leafy vegetables, leaves of cassava, spinach and green cabbage, baobab leaves, parsley, squash, dried bay leaves, carrots, squash, red peppers, cabbage) |  |  |  |  |  |  |
| R24 03G | G. Sweets (candy, biscuits, chocolate, cocoa powder, coffee powder) …) |  |  |  |  |  |  |
| R24 04A | **afternoon snack** | A. Starchy foods (cereals, tubers, plantains, cassava, sweet potatoes)) |  |  |  |  |  |  |
| R24 04B | B. Sauce (eggplant, peanut, seeds, okra, leaves, tomato) |  |  |  |  |  |  |
| R24 04C | C. Meat and offal/Fish Poultry/Eggs…shellfish |  |  |  |  |  |  |
| R24 04D | D. Drink (hibiscus, ginger, tamarind, passion fruit) |  |  |  |  |  |  |
| R24 04E | E. Dairy products (milk, cheese) |  |  |  |  |  |  |
| R24 04F | F. Fruit/Vegetables (Ripe mangoes, oranges, melons, ripe papayas, mandarins, grapefruit/ Dark green leafy vegetables, cassava leaves, spinach and green cabbage leaves, baobab leaves, parsley, squash, dried bay leaves, carrots, squash, red peppers, cabbage) |  |  |  |  |  |  |
| R24 04G | G. Sweets (candy, biscuits, chocolate, cocoa powder, coffee powder, etc.) |  |  |  |  |  |  |
| R24 05A | **Dinner** | A. Starchy foods (cereals, tubers, plantains, cassava, sweet potatoes)) |  |  |  |  |  |  |
| R24 05B | B. Sauce (eggplant, peanut, seeds, okra, leaves, tomato) |  |  |  |  |  |  |
| R24 05C | C. Meat and offal/Fish Poultry/Eggs…shellfish |  |  |  |  |  |  |
| R24 05D | D. Drink (hibiscus, ginger, tamarind, passion fruit) |  |  |  |  |  |  |
| R24 05E | E. Dairy products (milk, cheese)) |  |  |  |  |  |  |
| R24 05F | F Fruit/Vegetables (Ripe mangoes, oranges, melons, ripe papayas, mandarins, grapefruit/Dark green leafy vegetables, cassava leaves, spinach and green cabbage leaves, baobab leaves, parsley, squash, dried bay leaves, carrots, squash, red peppers, cabbage) |  |  |  |  |  |  |
| R24 05G | G. Sweets (candy, biscuits, chocolate, cocoa powder, coffee powder, etc.) |  |  |  |  |  |  |
| R24 06A | **During the night** | A. Starchy foods (cereals, tubers, plantains, cassava, sweet potatoes) |  |  |  |  |  |  |
| R24 06B | B. Sauce (eggplant, peanut, seeds, okra, leaves, tomato) |  |  |  |  |  |  |
| R24 06C | C. Meat and offal/Fish Poultry/Eggs…shellfish |  |  |  |  |  |  |
| R24 06D | D. Drink (hibiscus, ginger, tamarind, passion fruit) |  |  |  |  |  |  |
| R24 06E | E. Dairy products (milk, cheese) |  |  |  |  |  |  |
| R24 06F | F. Fruit/Vegetables (Ripe mangoes, oranges, melons, ripe papayas, mandarins, grapefruit/ Dark green leafy vegetables, cassava leaves, spinach and green cabbage leaves, baobab leaves, parsley, squash, dried bay leaves, carrots, squash, red peppers, cabbage) |  |  |  |  |  |  |
| R24 06G | G. Sweets (candy, biscuits, chocolate, cocoa powder, coffee powder, etc.) |  |  |  |  |  |  |
