# Supplementary material for: Dietary intake, food composition and nutritional status of chronic wound patients attending a health care centre in Côte d’Ivoire
Source: Research Square preprint supplement (doi:10.21203/rs.3.rs-8786462/v1), 2026-02-20
Supplement: Supplementary file 2 [file c4720d54157ddd89e3c2955e.docx]

**SECTION 9: FREQUENCY OF FOOD CONSUMPTION**

Of the following foods, which ones do you usually consume [PATIENT'S NAME]?

| **Food consumption frequency questionnaire** | | | | | | | Food consumption frequency questionnaire |
| --- | --- | --- | --- | --- | --- | --- | --- |
| Food or dishes | Rarely/Never | How many times per | | | | Comment |
| Day | Week | Month | Year |  |
| **Cereals** |  | | | | | |
| Rice |  |  |  |  |  |  |
| cooked corn dough |  |  |  |  |  |  |
| Braised/raw corn |  |  |  |  |  |  |
| bread |  |  |  |  |  |  |
| Millet |  |  |  |  |  |  |
| Millet porridge/flour |  |  |  |  |  |  |
| Pasta |  |  |  |  |  |  |
| Sorghum |  |  |  |  |  |  |
| Fonio |  |  |  |  |  |  |
| Cookies |  |  |  |  |  |  |
| Beignets |  |  |  |  |  |  |
| Spaghetti |  |  |  |  |  |  |
| Vermicelli |  |  |  |  |  |  |
|  |  |  |  |  |  |  |
| **Staple foods** |  | | | | | |
| Boiled/braised yam |  |  |  |  |  |  |
| Pounded yam |  |  |  |  |  |  |
| Yam stew |  |  |  |  |  |  |
| Boiled/braised cassava |  |  |  |  |  |  |
| Pounded cassava |  |  |  |  |  |  |
| Cooked fermented cassava semolina (attiéké) |  |  |  |  |  |  |
| Mashed potatoes |  |  |  |  |  |  |
| Potato stew |  |  |  |  |  |  |
| Potato chips |  |  |  |  |  |  |
| fermented and cooked cassava paste |  |  |  |  |  |  |
| cooked cassava flour paste |  |  |  |  |  |  |
| Cocoa yam |  |  |  |  |  |  |
| Pounded plantain |  |  |  |  |  |  |
| Boiled/braised plantain |  |  |  |  |  |  |
| fried ripe plantains |  |  |  |  |  |  |
| Plantain fritter |  |  |  |  |  |  |
| White sweet potato |  |  |  |  |  |  |
| Yellow sweet potato |  |  |  |  |  |  |
| Orange flesh sweet potato |  |  |  |  |  |  |
| Other |  |  |  |  |  |  |
|  |  |  |  |  |  |  |
| **Legume/nut/seed** | | | | | | |
| Soy |  |  |  |  |  |  |
| White/red beans |  |  |  |  |  |  |
| Ground pea |  |  |  |  |  |  |
| Peanut |  |  |  |  |  |  |
| Cashew nuts |  |  |  |  |  |  |
| Coconut |  |  |  |  |  |  |
| Cola |  |  |  |  |  |  |
| Sweet pea |  |  |  |  |  |  |
|  |  |  |  |  |  |  |
| **Meat/fish/shellfish/poultry** | | | | | | |
| Fresh chicken |  |  |  |  |  |  |
| Smoked chicken |  |  |  |  |  |  |
| Fresh fish |  |  |  |  |  |  |
| Smoked fish |  |  |  |  |  |  |
| Dried fish/powder |  |  |  |  |  |  |
| guinea fowl |  |  |  |  |  |  |
| Other poultry |  |  |  |  |  |  |
| Beef |  |  |  |  |  |  |
| Pork |  |  |  |  |  |  |
| Goat |  |  |  |  |  |  |
| Sheep |  |  |  |  |  |  |
| Canned fish |  |  |  |  |  |  |
| Deer/gazelle |  |  |  |  |  |  |
| Grasscutter |  |  |  |  |  |  |
| Bat/rat/mouse |  |  |  |  |  |  |
| Other bush meats |  |  |  |  |  |  |
| Liver |  |  |  |  |  |  |
| Kidney |  |  |  |  |  |  |
| Offal |  |  |  |  |  |  |
| Crab |  |  |  |  |  |  |
| Snail |  |  |  |  |  |  |
| Prawn |  |  |  |  |  |  |
| Soft-boiled egg |  |  |  |  |  |  |
| Omelettes |  |  |  |  |  |  |
| **Insects and other animals** | | | | | | |
| Crickets |  |  |  |  |  |  |
| Termite |  |  |  |  |  |  |
| Gecko |  |  |  |  |  |  |
| Insects and larvae |  |  |  |  |  |  |
| **Dairy products** | | | | | | |
| Milk powder |  |  |  |  |  |  |
| Sweetened milk |  |  |  |  |  |  |
| Cow's milk |  |  |  |  |  |  |
| Yoghurts |  |  |  |  |  |  |
| Others |  |  |  |  |  |  |
|  |  |  |  |  |  |  |
| **Vegetables** | | | | | | |
| Cabbage |  |  |  |  |  |  |
| Carrot |  |  |  |  |  |  |
| Salad leaves |  |  |  |  |  |  |
| Taro leaves |  |  |  |  |  |  |
| Bean leaves |  |  |  |  |  |  |
| Leaves of the kapok tree |  |  |  |  |  |  |
| Banoukou leaves |  |  |  |  |  |  |
| Potato leaves |  |  |  |  |  |  |
| Cassava leaves |  |  |  |  |  |  |
| Sorrel leaf |  |  |  |  |  |  |
| Mushrooms |  |  |  |  |  |  |
| fermented spice made from néré seeds (Soumara) |  |  |  |  |  |  |
|  |  |  |  |  |  |  |
| **Fruit**s | | | | | | |
| Citrus (orange/lemon) |  |  |  |  |  |  |
| Palm fruit |  |  |  |  |  |  |
| Sweet banana |  |  |  |  |  |  |
| Pineapple |  |  |  |  |  |  |
| Mango |  |  |  |  |  |  |
| Papaya |  |  |  |  |  |  |
| Guava |  |  |  |  |  |  |
| Avocado |  |  |  |  |  |  |
| Passion fruit |  |  |  |  |  |  |
| Soursop |  |  |  |  |  |  |
| Nere fruit |  |  |  |  |  |  |
| Shea fruit |  |  |  |  |  |  |
| Banoukou |  |  |  |  |  |  |
| Popani |  |  |  |  |  |  |
| Koto |  |  |  |  |  |  |
| Mandarin |  |  |  |  |  |  |
| Baobab fruit |  |  |  |  |  |  |
| Mahogany apple |  |  |  |  |  |  |
|  |  |  |  |  |  |  |
| **Oil and grease** | | | | | | |
| Palm oil |  |  |  |  |  |  |
| Cooking oil |  |  |  |  |  |  |
| Shea butter |  |  |  |  |  |  |
|  |  |  |  |  |  |  |
| **Drinks** | | | | | | |
| Soda |  |  |  |  |  |  |
| Tea |  |  |  |  |  |  |
| Soukainiba |  |  |  |  |  |  |
| Coffee |  |  |  |  |  |  |
| Beer |  |  |  |  |  |  |
| Palm wine |  |  |  |  |  |  |
| fermented millet beer (Tchapalo) |  |  |  |  |  |  |
| Wine |  |  |  |  |  |  |
| Koto |  |  |  |  |  |  |
| brandy distilled from palm wine (*Koutoukou*) |  |  |  |  |  |  |
| Moukoudj |  |  |  |  |  |  |
| Orange juice |  |  |  |  |  |  |
| Lemon juice |  |  |  |  |  |  |
| Ginger juice |  |  |  |  |  |  |
| [Hibiscus](https://www.google.com/search?q=hibiscus+juice&sca_esv=bccd47c9b4a088db&sxsrf=AE3TifMGsHFAp_3UUGreWDCkkj0I1uzGHw%3A1761943944999&ei=iCEFadfgPNiGkdUPpaPn2QQ&ved=2ahUKEwi8m9_rqM-QAxXQVKQEHfj9OlwQgK4QegQIAxAD&uact=5&oq=c%27est+quoi+le+bissap+en+anglais&gs_lp=Egxnd3Mtd2l6LXNlcnAiH2MnZXN0IHF1b2kgbGUgYmlzc2FwIGVuIGFuZ2xhaXMyBRAhGKABSIZTUPwTWLBGcAV4AJABAJgBswKgAcUwqgEIMC4yMy43LjG4AQPIAQD4AQGYAh-gAowywgIEECMYJ8ICChAuGIAEGEMYigXCAg0QABiABBixAxhDGIoFwgILEC4YgAQYsQMYgwHCAhEQLhiABBixAxjRAxiDARjHAcICBRAAGIAEwgIOEAAYgAQYsQMYgwEYigXCAggQABiABBixA8ICChAAGIAEGEMYigXCAggQLhiABBixA8ICCxAAGIAEGLEDGIMBwgIKECMYgAQYJxiKBcICChAAGIAEGBQYhwLCAggQABgWGAoYHsICBhAAGBYYHsICCBAAGIAEGKIEwgIFEAAY7wXCAgcQIRigARgKmAMAiAYBkgcJMC4xOS4xMS4xoAe8pAKyBwkwLjE5LjExLjG4B4wywgcJMC4xMC4xOC4zyAeKAQ&sclient=gws-wiz-serp&mstk=AUtExfDVFMGFkAE7maujx3pMjQSKQkhUfp3JLcFNuwNtO_a0qCSbpyJ_VDovL7ZT6byGo82jSiyKAfcA9MFRRbIRsCWriZoocDZCci7MijEEVnbiV_MktlL6qV2OiSpOc4T-Ipm-pqyUQQ9h0iAVHPS8mJqPop2cXxQLIIG0pHXnh3ocFfnvZp155Lqz1R5MZpBGaZrUjSTZ6iijeOSJ5AncPhnS5r0EsvPOBAD50rT75ur8G-7FU6U3a7R3BaAw90dCcVBiwwUYQkmEJwdJORsf-0f2jwl4RchKLvSmP4f3Dd7RF_3Er36CSGkc6ZY5TV9Snp00SfnoTuiOl7r_e85mzLMT13iD_l8VXxEQQPzrPryj3Ez6CSdSbiKVeFsS8C3XP9MTJ0e17nN4X2tXYvxKadS3rf_xXZBy8dCDtb5hrtkdsUoS-cwKzFqdY4uUxVkt&csui=3) juice |  |  |  |  |  |  |
| Baobab juice |  |  |  |  |  |  |
| Passion fruit juice |  |  |  |  |  |  |
| Cocoa juice |  |  |  |  |  |  |
| Other, please specify |  |  |  |  |  |  |
|  |  |  |  |  |  |  |
| **Sauces** | | | | | | |
| Fresh okra sauce |  |  |  |  |  |  |
| Dried okra (gbon) sauce |  |  |  |  |  |  |
| Palm seed sauce |  |  |  |  |  |  |
| Aubergine sauce |  |  |  |  |  |  |
| Tomato sauce |  |  |  |  |  |  |
| Peanuts sauce |  |  |  |  |  |  |
| Jute leaves sauce |  |  |  |  |  |  |
| Pistachio sauce |  |  |  |  |  |  |
| dried kapok leaf powder |  |  |  |  |  |  |
| Spinach sauce |  |  |  |  |  |  |
| Potato leaf sauce |  |  |  |  |  |  |
| Cassava leaf sauce |  |  |  |  |  |  |
| Taro leaf sauce |  |  |  |  |  |  |
| sorrel leaves sauce |  |  |  |  |  |  |
| Tomato sauce (cabbage, carrot, cucumber, pepper, squash) |  |  |  |  |  |  |
| Other sauces to be specified |  |  |  |  |  |  |
|  |  |  |  |  |  |  |
| **Other things consumed frequently** | | | | | | |
|  |  |  |  |  |  |  |
