# Supplementary material for: Dietary intake, food composition and nutritional status of chronic wound patients attending a health care centre in Côte d’Ivoire
Source: Research Square preprint supplement (doi:10.21203/rs.3.rs-8786462/v1), 2026-02-20
Supplement: Supplementary file 3 [file e90223f331a4416c74d00d57.xlsx]

## Sheet: Study file
Weight0	Hight0	BMI0	NS0	Diagnostic	DateofDiagnostic	Woundsize0
63	1.83	18.81	2	TW	2019-05-22	312
37	1.55	15.4	3	TW	2019-05-23	500
37	1.48	16.89	3	TW	2019-05-23	1290
50	1.62	19.05	3	TW	2019-05-13	600
66	1.62	25.15	3	TW	2019-06-10	3575
58	1.75	18.94	3	TW	2019-05-11	2880
24	1.33	13.57	1	TW	2019-05-25	245
65	1.53	27.77	4	TW	2019-05-10	760
70	1.76	22.6	3	TW	2019-06-22	400
32	1.42	15.87	3	TW	2019-07-08	910
40	1.23	26.44	4	TW	2019-06-11	875
24	1.2	16.67	3	TW	2019-07-13	1350
55	1.52	23.81	4	TW	2019-06-05	2500
120	1.65	44.08	4	TW	2019-02-14	13.11
22	1.24	14.31	3	TW	2019-11-28	2000
67	1.74	22.13	3	Ery	2019-07-18	3750
27	1.29	16.22	3	Ery	2019-09-06	875
59	1.7	20.42	3	Ery	2019-10-08	4000
53	1.64	19.71	3	Ery	2019-11-15	2700
85	1.53	36.31	4	Ery	2020-01-06	9600
70	1.6	27.34	4	UB	2019-05-22	1600
67	1.76	21.63	3	UB	2019-05-23	12650
15	0.97	15.94	3	UB	2019-05-25	3500
50	1.54	21.08	3	UB	2019-06-14	5200
41	1.49	18.47	3	UB	2019-05-15	1125
18	1.1	14.88	3	UB	2019-07-11	1064
32	1.4	16.33	3	UB	2019-07-11	500
43	1.54	18.13	3	UB	2019-07-11	6750
50	1.63	18.82	3	UB	2019-07-11	6300
45	1.54	18.97	1	UB	2019-07-12	750
15	1.07	13.1	1	UB	2019-07-18	3000
60	1.63	22.58	3	UB	2019-07-18	450
15	1.03	14.14	1	UB	2019-07-18	12650
17	1.1	14.05	1	UB	2019-07-10	300
25	1.3	14.79	3	UB	2019-07-18	12995
77	1.89	21.56	3	UB	2019-08-16	2025
40	1.63	15.06	1	UB	2019-08-23	1750
22	1.23	14.54	3	UB	2019-08-10	2025
12	0.98	12.49	1	UB	2019-08-19	12650
41	1.57	16.63	1	UB	2019-08-23	12650
21	1.25	13.44	3	UB	2019-08-27	4675
50	1.66	18.14	3	UB	2019-09-11	4000
22	1.27	13.64	1	UB	2019-09-11	6400
20	1.22	13.44	1	UB	2019-09-12	1800
43	1.53	18.37	3	UB	2019-09-23	1050
23	1.23	15.2	3	UB	2019-10-07	3600
26	1.33	14.7	1	UB	2019-10-07	5700
50	1.72	16.9	1	UB	2019-10-11	300
50	1.73	16.71	1	UB	2019-11-15	1500
24	1.3	14.2	3	UB	2019-11-18	7700
72	1.7	24.91	3	UB	2019-11-18	1050
44	1.59	17.4	3	UB	2019-12-13	1050
36	1.43	17.6	3	UB	2019-11-19	500
78	1.7	26.99	4	UB	2019-11-21	400
22	1.23	14.54	3	UB	2019-12-09	25
42	1.47	19.44	3	UB	2019-12-13	1050
29	1.39	15.01	3	UB	2019-12-18	1600
67	1.76	21.63	3	UB	2019-05-23	12650
15	0.97	15.94	3	UB	2019-05-25	3500
50	1.54	21.08	3	UB	2019-06-14	5200
41	1.49	18.47	3	UB	2019-05-15	1125
18	1.1	14.88	3	UB	2019-07-11	1064
32	1.4	16.33	3	UB	2019-07-11	500
43	1.54	18.13	3	UB	2019-07-11	6750
50	1.63	18.82	3	UB	2019-07-11	6300
60	1.63	22.58	3	UB	2019-07-18	450
25	1.3	14.79	3	UB	2019-07-18	12995
